# Supplementary material for: Transporter engineering and enzyme evolution for pyruvate production fromd/l-alanine with a whole-cell biocatalyst expressingl-amino acid deaminase from Proteus mirabilis
Source: Royal Society of Chemistry journal article supplement (doi:10.1039/c6ra16507a), 2016-01-01
Supplement: c6ra16507a1.pdf [file c6ra16507a1.pdf]

Supplementary Information

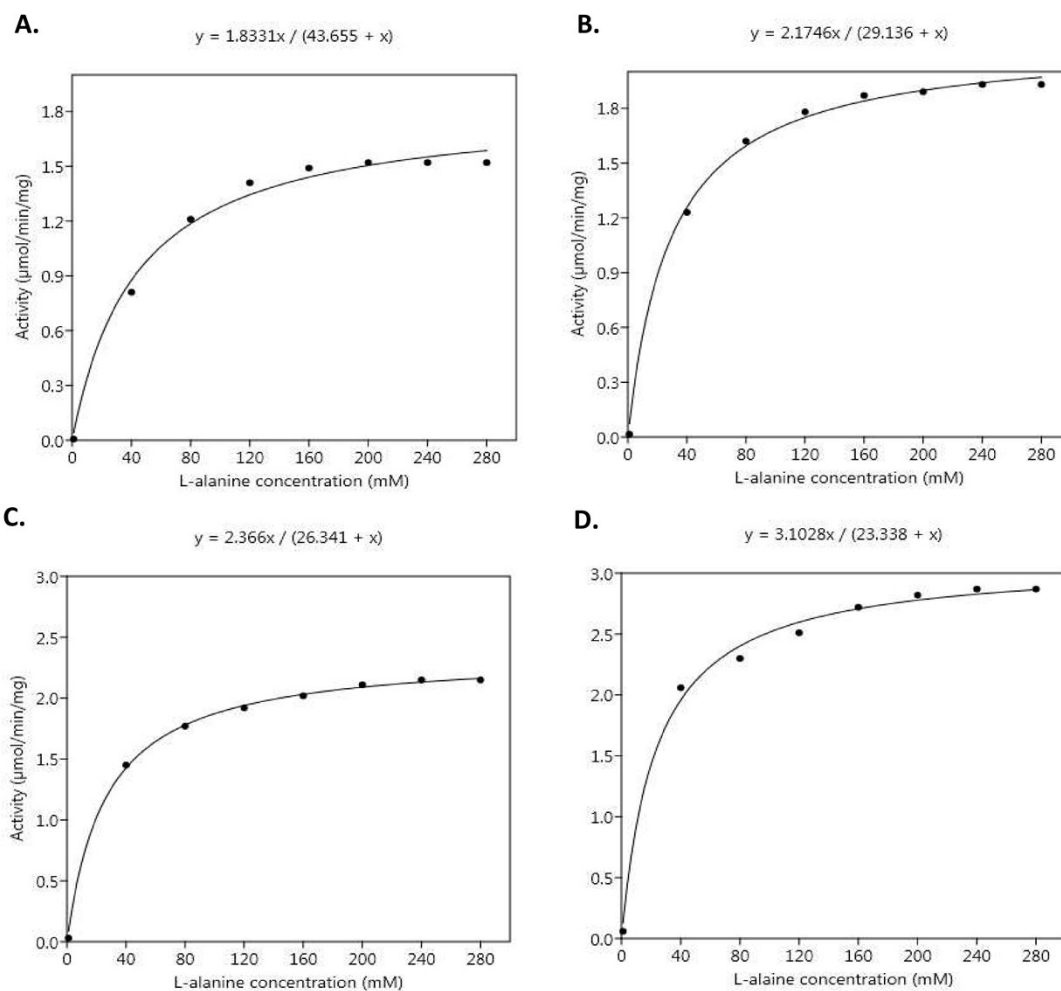

**Figure S1:** Michaelis-Menten graphs and curve fits using L-alanine as a substrate. **A.** Wild type pm1; **B.** pm1ep1; **C.** pm1ep2; & **D.** pm1ep3.

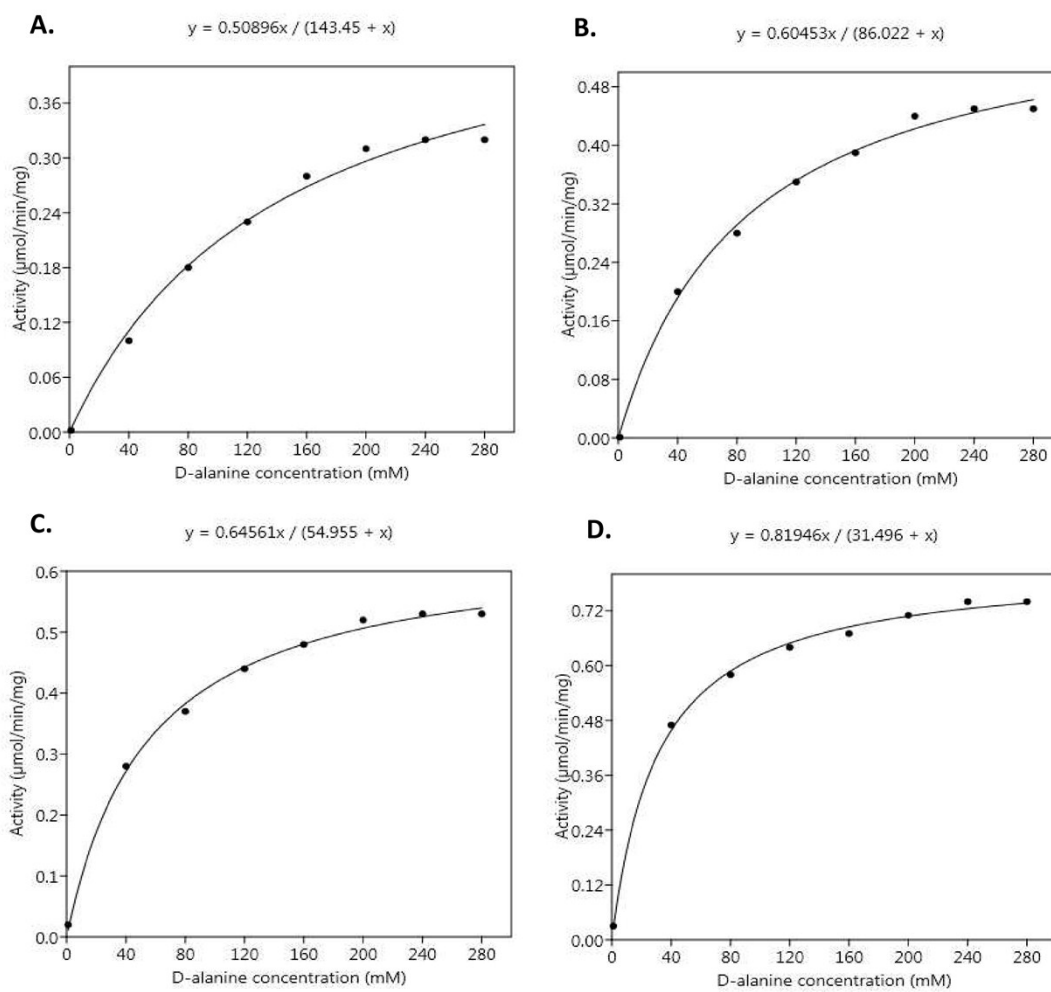

**Figure S2:** Michaelis-Menten graphs and curve fits using D-alanine as a substrate. **A.** Wild type pm1; **B.** pm1ep1; **C.** pm1ep2; & **D.** pm1ep3.

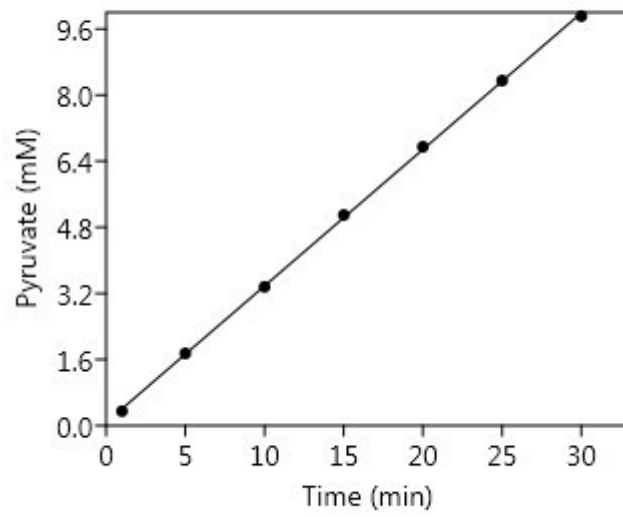

**Figure S3:** Initial pyruvate production by recombinant strain containing pm1ep3.

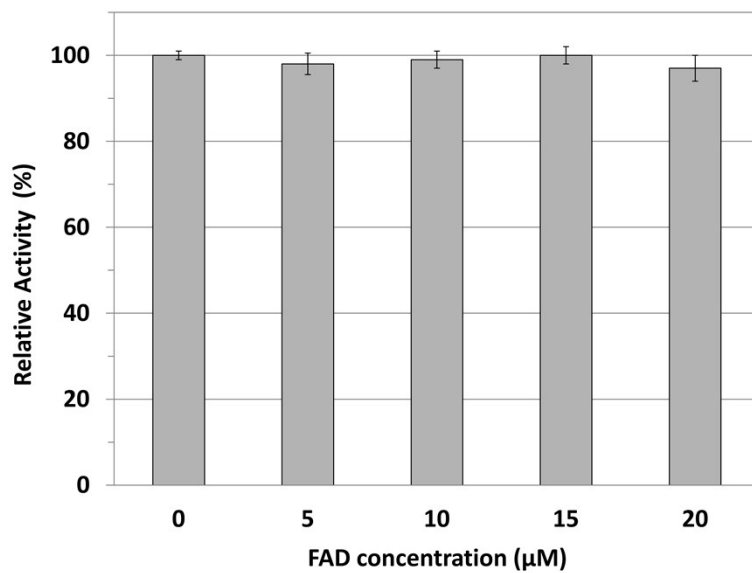

**Figure S4:** Effect of external concentration of FAD on the enzyme's activity. The highest activity of the pm1 ( $1.83 \mu\text{mol}\cdot\text{min}^{-1}\cdot\text{mg}^{-1}$ ) was defined as 100%.

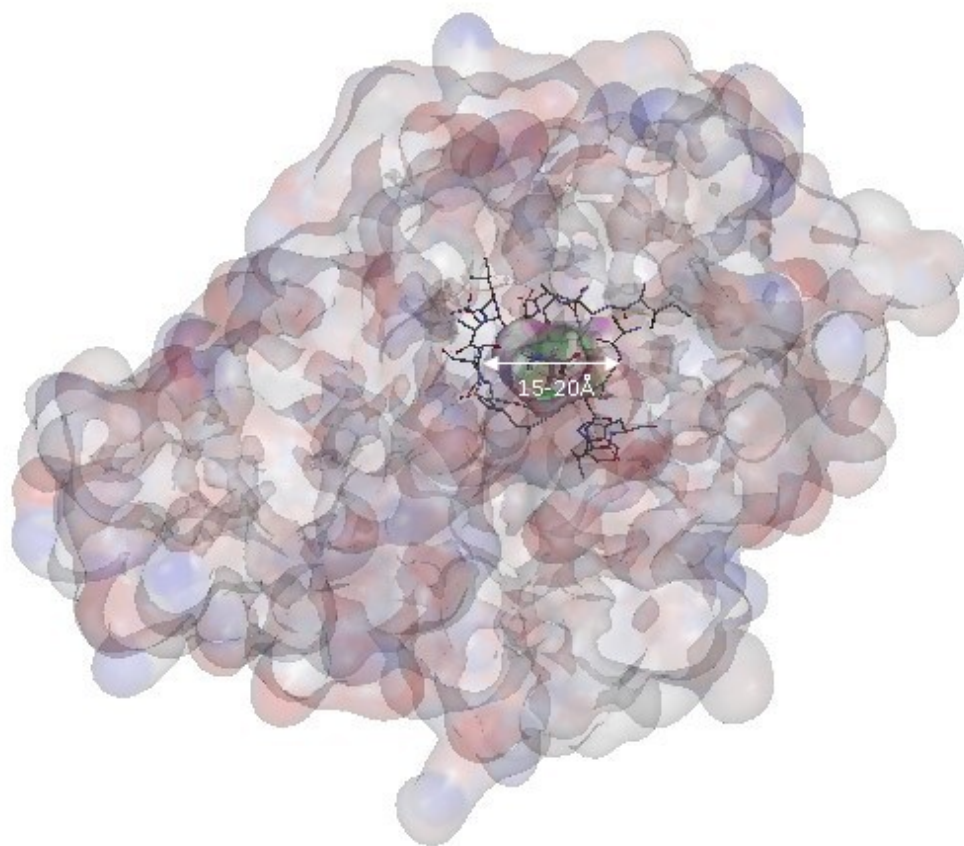

**Figure S5:** Substrate entrance site in pm1 (surface representation).

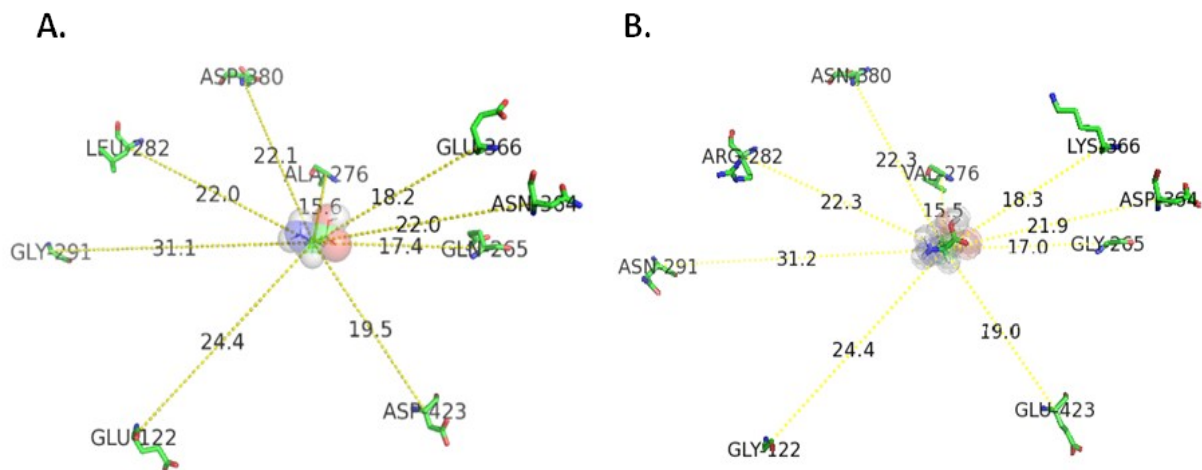

**Figure S6:** Molecular distances of alanine (substrate) from the mutant sites. **A.** in the wild type pm1; **B.** in the mutant pm1ep3.

**Table S1:** Primers used in this study

| Primer name         | Nucleotide sequence (5'-3')                                                |
|---------------------|----------------------------------------------------------------------------|
|                     | Primer used for epPCR                                                      |
| Pm1_F1              | CGCGGATCCATGGCAATAAGTAGAAGAAAATTTA                                         |
| Pm1_R1              | TCCGAGCTCTTAGAAACGATACAGACTAAATGGT                                         |
|                     | Primer used for genes knockout and verification                            |
| <i>cycA</i> -knockF | ATGGTAGATCAGGTAAAAGTCGTTGCCGATGATCAGGCTCCGGCTGAACAATTCCGGGGATCCGTCGAC<br>C |
| <i>cycA</i> -knockR | TTATTTCCGCAGTTCAGCAGCCCGCTTCTTACCAATAAACAACCAGCCCATGTAGGCTGGAGCTGCTTCG     |
| <i>cycA</i> -verF   | GCCTGAACAACACAGACAGGTACAGGAAGA                                             |
| <i>cycA</i> -verR   | CTGGATGGCATTGCGCCATCCAGCATGATA                                             |
| <i>amaP</i> -knockF | ATGATGAACACGGAAGGTAATAACGGTAACAAACCTCTCGGTCTATGGAAATTCCGGGGATCCGTCGAC<br>C |
| <i>amaP</i> -knockR | TTATACGGTTTTATTGCGCTTCATGACCATTGCCACAATAAGGCTGAGTATGTAGGCTGGAGCTGCTTCG     |
| <i>amaP</i> -verF   | TCGGTCGCTAAGCAACTCGGCTATAACGTG                                             |
| <i>amaP</i> -verR   | ACCGCCACCACAATAATACAGGAAGTACTG                                             |
| <i>lldP</i> -knockF | ATGAATCTCTGGCAACAAAACACTACGATCCC GCCGGGAATATCTGGCTTTCATTCCGGGGATCCGTCGACC  |
| <i>lldP</i> -knockR | TTAAGGAATCATCCACGTTAAGACATAAGCCTGAAGCGTGGTGATCACGCTGTAGGCTGGAGCTGCTTCG     |
| <i>lldP</i> -verF   | CATTACACGATGTGCGTGGACTCCAGGAGA                                             |
| <i>lldP</i> -verR   | CGGCAACCTCGTCTGACAGGCGTCTGGGTA                                             |

**Table S2:** Thermodynamic parameter for L-alanine binding to wild type and its mutants.

| Enzyme          | $K_d$ (mM)   | $\Delta H^\circ$ (kcal.mol <sup>-1</sup> ) | $\Delta G^\circ$ (kcal.mol <sup>-1</sup> ) |
|-----------------|--------------|--------------------------------------------|--------------------------------------------|
| Wild type (Pm1) | 15.21 ± 0.34 | -9.53 ± 0.15                               | -7.08 ± 0.07                               |
| Pm1ep1          | 11.93 ± 0.12 | -11.09 ± 0.21                              | -6.45 ± 0.11                               |
| Pm1ep2          | 9.15 ± 0.11  | -12.14 ± 0.08                              | -5.76 ± 0.08                               |
| Pm1ep3          | 6.76 ± 0.09  | -13.27 ± 0.14                              | -4.97 ± 0.03                               |

$K_d$  and  $\Delta H^\circ$  were obtained from fit to a binding isotherm, while  $\Delta G^\circ$  was calculated from  $\Delta G^\circ = RT \ln K_d$ . Each value represents the mean of three or more independent ITC experiments.



**Table S3:**  $K_m$  values of different amino acid deaminases/oxidases.

| Enzyme's name          | Origin                     | Substrate       | $K_m$ (mM) | References |
|------------------------|----------------------------|-----------------|------------|------------|
| L-amino acid deaminase | <i>Proteus mirabilis</i>   | L-Phenylalanine | 31.55      | S5         |
| L-amino acid deaminase | <i>Proteus mirabilis</i>   | L-Phenylalanine | 26.2       | S1         |
| L-amino acid deaminase | <i>Proteus myxofaciens</i> | L-Phenylalanine | 2.28       | S2         |
| L-Amino Acid Oxidases  | <i>Proteus rettgeri</i>    | L-Lysine        | 23.2       | S3         |
| L-amino acid deaminase | <i>Proteus vulgaris</i>    | L-Methionine    | 305.0      | S4         |

S1: Y. Hou, G. S. Hossain, J. Li, H. D. Shin, L. Liu, and G. Du, *Appl. Microbiol. Biotechnol.*, 2015, **99**, 8391-8402. S2: D.

P. Pantaleone, A. M. Geller, and P. P. Taylor, *J. Mol. Catal. B: Enzymol.*, 2001, **11**, 795–803. S3: J. A. Duerre, and S.

Chakrabarty, *J. Bacteriol.*, 1975, **121**, 656-663. S4: G. S. Hossain, J. Li, H. D. Shin, G. Du, M. Wang, L. Liu, and J.

Chen, *PLoS One*, 2014, **9**, e114291.
